# Supplementary material
Source: PubMed Central journal article supplement (PMC9236568)
Supplement: mmc1.pdf [file mmc1.pdf]

# THE LANCET

## Respiratory Medicine

### Supplementary appendix

This appendix formed part of the original submission and has been peer reviewed. We post it as supplied by the authors.

Supplement to: Abhishek A, Boyton RJ, Peckham N, et al. Effect of a 2-week interruption in methotrexate treatment versus continued treatment on COVID-19 booster vaccine immunity in adults with inflammatory conditions (VROOM study): a randomised, open label, superiority trial. *Lancet Respir Med* 2022; published online June 27. [https://doi.org/10.1016/S2213-2600\(22\)00186-2](https://doi.org/10.1016/S2213-2600(22)00186-2).

## Supplementary appendix

### Table of content

|                                                                                                  |         |
|--------------------------------------------------------------------------------------------------|---------|
| Table S1: Reasons for withdrawal by study arms.                                                  | Page 2  |
| Table S2: Compliance with intervention by study arms.                                            | Page 2  |
| Table S3: Sensitivity analyses for primary outcome (Anti-S1-RBD titre [U/mL]) at 4 and 12 weeks. | Page 3  |
| Table S4: Sub-group analyses for primary outcome (Anti-S1-RBD titre [U/mL]) at 4 and 12 weeks.   | Page 4  |
| Table S5: Patient disease activity by study arms.                                                | Page 8  |
| Table S6: Patient disease description by study arms.                                             | Page 9  |
| Table S7: Safety, flare outcomes and their treatment by study arms.                              | Page 10 |
| Figure S1: Flare treatment according to study arms during the 12-week study period.              | Page 12 |
| <br>                                                                                             |         |
| List of investigators                                                                            | Page 13 |
| List of Data Monitoring Committee (DMC) and Trial Steering Committee (TSC) Members               | Page 15 |

**Table S1: Summary of reasons for withdrawal by study arms**

| <b>Reason for withdrawal</b>                                                                     | <b>Continue Methotrexate<br/>N=127</b> | <b>Suspend Methotrexate<br/>N=127</b> | <b>Total<br/>N=254</b> |
|--------------------------------------------------------------------------------------------------|----------------------------------------|---------------------------------------|------------------------|
| Participant taken off methotrexate by dermatologist and participant chose to withdraw from study | 1                                      | 0                                     | 1                      |
| Personal reasons                                                                                 | 0                                      | 1                                     | 1                      |
| Participant felt too ill to continue                                                             | 0                                      | 1                                     | 1                      |
| No reason given                                                                                  | 0                                      | 1                                     | 1                      |

**Table S2: Compliance with intervention by study arms**

|                                                                | <b>Continue Methotrexate<br/>N = 127</b> | <b>Suspend Methotrexate<br/>N = 127</b> |
|----------------------------------------------------------------|------------------------------------------|-----------------------------------------|
|                                                                | <b>n (%)</b>                             | <b>n (%)</b>                            |
| Compliant <sup>1</sup>                                         | 122 (96)                                 | 123 <sup>3</sup> (97)                   |
| Non-compliant                                                  | 1 (1)                                    | 1 (1)                                   |
| Missing data <sup>2</sup>                                      | 4 (3)                                    | 3 (2)                                   |
| <b>Methotrexate doses taken during the intervention period</b> |                                          |                                         |
| 0 doses                                                        | 0                                        | 123 <sup>3</sup>                        |
| 1 dose                                                         | 1                                        | 1                                       |
| 2 doses                                                        | 122                                      | 0                                       |
| Missing data <sup>2</sup>                                      | 4                                        | 3                                       |

Footnotes: 1. Participants in continue with methotrexate arm should have taken 2 doses of methotrexate, and are deemed compliant if they self-report to have taken 2 doses, participants in the suspend methotrexate arm should have taken 0 doses of methotrexate, and are deemed compliant if they self-report to have taken zero doses; 2. Participants did not reply to text messages asking about compliance; 3. Two participants in the methotrexate suspend arm did not take their methotrexate dose prior to their vaccination and therefore missed three weekly doses of methotrexate. One further participant in the methotrexate suspend arm did not take their methotrexate dose for 5 weeks post COVID-19 vaccination, and then restarted it.

**Table S3: Sensitivity analyses for primary outcome (Anti-S1-RBD titre [U/mL]) at 4 and 12 weeks**

|                                                                                                                                                                                                                                                                                                               | Continue<br>Methotrexate<br>(n) | Suspend Methotrexate<br>(n) | Sensitivity model:<br>GMR (95% CI) <sup>1</sup> |
|---------------------------------------------------------------------------------------------------------------------------------------------------------------------------------------------------------------------------------------------------------------------------------------------------------------|---------------------------------|-----------------------------|-------------------------------------------------|
| <b>Simple regression model adjusted for baseline and randomisation factors</b>                                                                                                                                                                                                                                |                                 |                             |                                                 |
| 4 weeks                                                                                                                                                                                                                                                                                                       | 126                             | 124                         | 2.21 (1.58, 3.09)                               |
| 12 weeks                                                                                                                                                                                                                                                                                                      | 124                             | 117                         | 2.14 (1.53, 3.01)                               |
| <b>Mixed effects model using per-protocol population<sup>1</sup></b>                                                                                                                                                                                                                                          |                                 |                             |                                                 |
| 4 weeks                                                                                                                                                                                                                                                                                                       | 122                             | 119                         | 2.21 (1.58, 3.09)                               |
| 12 weeks                                                                                                                                                                                                                                                                                                      | 120                             | 112                         | 2.14 (1.53, 3.01)                               |
| <b>Mixed effects model including time (days) between original vaccination and booster</b>                                                                                                                                                                                                                     |                                 |                             |                                                 |
| 4 weeks                                                                                                                                                                                                                                                                                                       | 125                             | 124                         | 2.18 (1.58, 3.03)                               |
| 12 weeks                                                                                                                                                                                                                                                                                                      | 126                             | 124                         | 2.08 (1.49, 2.89)                               |
| Interaction term (One day extra between previous vaccine dose and booster)                                                                                                                                                                                                                                    |                                 |                             | 1.01 (1.00, 1.01)                               |
| <b>Mixed effects model without booster vaccine type as covariate (post hoc)</b>                                                                                                                                                                                                                               |                                 |                             |                                                 |
| 4 weeks                                                                                                                                                                                                                                                                                                       | 125                             | 124                         | 2.18 (1.57, 3.03)                               |
| 12 weeks                                                                                                                                                                                                                                                                                                      | 126                             | 124                         | 2.08 (1.49, 2.89)                               |
| <b>Mixed effects model including methotrexate dose as covariate (post hoc)</b>                                                                                                                                                                                                                                |                                 |                             |                                                 |
| 4 weeks                                                                                                                                                                                                                                                                                                       | 125                             | 124                         | 2.19 (1.57, 3.04)                               |
| 12 weeks                                                                                                                                                                                                                                                                                                      | 126                             | 124                         | 2.11 (1.51, 2.94)                               |
| Footnotes: 1. Participants were excluded from the per-protocol analysis if they did not comply with the allocated intervention; if they missed further methotrexate doses not as part of the intervention; if they did not provide compliance information; and if they did not have follow-up data available. |                                 |                             |                                                 |

**Table S4: Sub-group analyses for primary outcome (Anti-S1-RBD titre [U/mL]) at 4 and 12 weeks**

|                                                                         | Continue methotrexate Geometric mean (95% CI) | Suspend methotrexate Geometric mean (95% CI) | Total Geometric mean (95% CI) | N   | Linear regression: GMR (95% CI) <sup>2</sup> |
|-------------------------------------------------------------------------|-----------------------------------------------|----------------------------------------------|-------------------------------|-----|----------------------------------------------|
| Sub-group analyses at 4 weeks                                           |                                               |                                              |                               |     |                                              |
| Methotrexate dose                                                       |                                               |                                              |                               |     |                                              |
| ≤ 15mg/week                                                             | 13809 (10340, 18442)                          | 22872 (17699, 29556)                         | 17555 (14407, 21392)          | 103 | 1·67 (1·20, 2·31)                            |
| >15mg/week                                                              | 8978 (7076, 11393)                            | 22670 (18240, 28176)                         | 14402 (12076, 17177)          | 147 | 2·54 (1·94, 3·33)                            |
| Interaction effect (>15mg vs ≤ 15mg/week)                               |                                               |                                              |                               |     | 0·66 (0·43, 1·003)                           |
| Methotrexate route of administration                                    |                                               |                                              |                               |     |                                              |
| Oral                                                                    | 11315 (8912, 14364)                           | 24052 (19324, 29936)                         | 16292 (13721, 19344)          | 151 | 2·15 (1·65, 2·82)                            |
| Subcutaneous injection                                                  | 10007 (7385, 13561)                           | 21007 (16313, 27053)                         | 14663 (11922, 18034)          | 99  | 2·09 (1·50, 2·93)                            |
| Interaction effect (injection vs oral)                                  |                                               |                                              |                               |     | 0·97 (0·63, 1·49)                            |
| Disease type                                                            |                                               |                                              |                               |     |                                              |
| Rheumatic (+/- skin) disease                                            | 10606 (8568, 13128)                           | 22282 (18547, 26770)                         | 15344 (13220, 17809)          | 199 | 2·14 (1·69, 2·70)                            |
| Skin disease alone                                                      | 11569 (7816, 17123)                           | 24698 (16759, 36399)                         | 16778 (12592, 22357)          | 51  | 2·10 (1·32, 3·33)                            |
| Interaction effect (skin disease alone vs rheumatic (+/- skin) disease) |                                               |                                              |                               |     | 0·98 (0·58, 1·65)                            |
| Age group                                                               |                                               |                                              |                               |     |                                              |
| < 40 years                                                              | 17756 (10527, 29945)                          | 17419 (9628, 31513)                          | 17587 (12465, 24812)          | 16  | 1·83 (0·78, 4·33)                            |
| 40 – 64 years                                                           | 9052 (7054, 11615)                            | 20584 (16734, 25319)                         | 13571 (11398, 16158)          | 142 | 2·09 (1·58, 2·76)                            |
| ≥ 65 years                                                              | 13051 (9555, 17827)                           | 27750 (20574, 37429)                         | 19031 (15181, 23857)          | 92  | 2·26 (1·60, 3·19)                            |
| Interaction effect < 40 vs ≥ 65 years                                   |                                               |                                              |                               |     | 0·81 (0·32, 2·06)                            |
| Interaction effect 40–64 vs ≥ 65 years                                  |                                               |                                              |                               |     | 0·92 (0·59, 1·44)                            |
| Previous SARS-CoV-2 infection                                           |                                               |                                              |                               |     |                                              |

|                                                               |                                                      |                      |                      |                      |     |                    |
|---------------------------------------------------------------|------------------------------------------------------|----------------------|----------------------|----------------------|-----|--------------------|
|                                                               | No                                                   | 9453 (7727, 11564)   | 19738 (16724, 23296) | 13635 (11865, 15669) | 207 | 2.04 (1.62, 2.56)  |
|                                                               | Yes                                                  | 20153 (13255, 30641) | 45645 (29380, 70916) | 30330 (22067, 41685) | 42  | 2.64 (1.58, 4.41)  |
| Interaction effect (infection vs. no)                         |                                                      |                      |                      |                      |     | 0.77 (0.44, 1.36)  |
| Primary COVID-19 vaccine type                                 |                                                      |                      |                      |                      |     |                    |
|                                                               | AstraZeneca AZD1222                                  | 9037 (7289, 11204)   | 21084 (17551, 25327) | 13593 (11641, 15873) | 165 | 2.42 (1.87, 3.12)  |
|                                                               | mRNA (Pfizer-BioNTech BNT162b2 or Moderna mRNA-1273) | 15833 (11265, 22251) | 27202 (19653, 37651) | 20890 (16471, 26495) | 83  | 1.65 (1.150, 2.37) |
| Interaction effect (mRNA [BNT162b2 or mRNA-1273] vs. AZD1222) |                                                      |                      |                      |                      |     | 1.46 (0.94, 2.29)  |
| COVID-19 booster brand                                        |                                                      |                      |                      |                      |     |                    |
|                                                               | Pfizer-BioNTech BNT162b2                             | 10512 (8543, 12935)  | 21716 (18128, 26014) | 14923 (12897, 17267) | 206 | 1.98 (1.58, 2.49)  |
|                                                               | AstraZeneca AZD1222                                  | 11679 (3212, 42466)  | 32074 (4089, 251566) | 17495 (6939, 44110)  | 10  | 3.96 (1.39, 11.30) |
|                                                               | Moderna mRNA-1273                                    | 13439 (8226, 21955)  | 29023 (17274, 48763) | 20789 (14350, 30118) | 31  | 2.90 (1.56, 5.38)  |
| Interaction effect (AZD1222 vs. BNT162b2)                     |                                                      |                      |                      |                      |     | 2.00 (0.68, 5.85)  |
| Interaction effect (mRNA-1273 vs. BNT162b2)                   |                                                      |                      |                      |                      |     | 1.46 (0.76, 2.89)  |
| Sub-group analyses at 12 weeks                                |                                                      |                      |                      |                      |     |                    |
| Methotrexate dose                                             |                                                      |                      |                      |                      |     |                    |
|                                                               | ≤ 15mg/week                                          | 11057 (8111, 15074)  | 15905 (12393, 20412) | 13118 (10722, 16048) | 100 | 1.44 (0.99, 2.10)  |
|                                                               | >15mg/week                                           | 6412 (4899, 8393)    | 16946 (13114, 21898) | 10388 (8499, 12698)  | 141 | 2.66 (1.93, 3.65)  |
| Interaction effect (>15mg/week vs. ≤ 15mg/week)               |                                                      |                      |                      |                      |     | 1.85 (1.12, 3.04)  |
| Methotrexate route of administration                          |                                                      |                      |                      |                      |     |                    |
|                                                               | Oral                                                 | 8556 (6630, 11041)   | 17037 (13325, 21783) | 11851 (9856, 14249)  | 148 | 2.03 (1.48, 2.78)  |
|                                                               | Subcutaneous injection                               | 7367 (5140, 10558)   | 15779 (12015, 20721) | 10826 (8564, 13686)  | 93  | 2.09 (1.40, 3.10)  |
| Interaction effect (injection vs. oral)                       |                                                      |                      |                      |                      |     | 1.03 (0.62, 1.70)  |
| Disease type                                                  |                                                      |                      |                      |                      |     |                    |

|                               |                                                                          |                      |                      |                      |     |                    |
|-------------------------------|--------------------------------------------------------------------------|----------------------|----------------------|----------------------|-----|--------------------|
|                               | Rheumatic (+/- skin) disease                                             | 7427 (5908, 9336)    | 16081 (12970, 19938) | 10775 (9131, 12714)  | 191 | 2.21 (1.67, 2.91)  |
|                               | Skin disease alone                                                       | 11378 (7028, 18419)  | 18241 (13208, 25193) | 14406 (10806, 19206) | 50  | 1.56 (0.91, 2.67)  |
|                               | Interaction effect (skin disease alone vs. rheumatic (+/- skin) disease) |                      |                      |                      |     | 0.71 (0.39, 1.29)  |
| <hr/>                         |                                                                          |                      |                      |                      |     |                    |
| Age group                     |                                                                          |                      |                      |                      |     |                    |
|                               | < 40 years                                                               | 18774 (9973, 35344)  | 11626 (6487, 20836)  | 14540 (9809, 21554)  | 15  | 1.18(0.42, 3.27)   |
|                               | 40 – 64 years                                                            | 7239 (5426, 9657)    | 13701 (10923, 17185) | 9795 (8089, 11861)   | 135 | 1.74 (1.25, 2.41)  |
|                               | ≥ 65 years                                                               | 8461 (6135, 11668)   | 22945 (16669, 31583) | 13857 (10840, 17714) | 91  | 2.88 (1.93, 4.28)  |
|                               | Interaction effect < 40 vs ≥ 65 years                                    |                      |                      |                      |     | 0.41 (0.14, 1.23)  |
|                               | Interaction effect 40–64 vs ≥ 65 years                                   |                      |                      |                      |     | 0.60 (0.36, 1.01)  |
| <hr/>                         |                                                                          |                      |                      |                      |     |                    |
| Previous SARS-CoV-2 infection |                                                                          |                      |                      |                      |     |                    |
|                               | No                                                                       | 7089 (5623, 8937)    | 14522 (12117, 17405) | 10055 (8611, 11742)  | 199 | 1.98 (1.51, 2.59)  |
|                               | Yes                                                                      | 15204 (10321, 22397) | 30868 (17822, 53464) | 21477 (15322, 30106) | 41  | 2.46 (1.34, 4.51)  |
|                               | Interaction effect (Infection yes vs. no)                                |                      |                      |                      |     | 0.80 (0.41, 1.56)  |
| <hr/>                         |                                                                          |                      |                      |                      |     |                    |
| Primary COVID-19 vaccine type |                                                                          |                      |                      |                      |     |                    |
|                               | AstraZeneca AZD1222                                                      | 10634 (7365, 15354)  | 20589 (14334, 29574) | 14797 (11377, 19245) | 159 | 2.21 (1.63, 2.99)  |
|                               | mRNA (Pfizer-BioNTech BNT162b2 or Moderna mRNA-1273)                     | 7107 (5540, 9118)    | 15025 (12377, 18240) | 10117 (8543, 11981)  | 80  | 1.78 (1.16, 2.72)  |
|                               | Interaction effect (mRNA [BNT162b2 or mRNA-1273] vs. AZD1222)            |                      |                      |                      |     | 1.24 (0.73, 2.10)  |
| <hr/>                         |                                                                          |                      |                      |                      |     |                    |
| COVID-19 booster brand        |                                                                          |                      |                      |                      |     |                    |
|                               | Pfizer-BioNTech BNT162b2                                                 | 7744 (6183, 9700)    | 16545 (13568, 20175) | 11084 (9454, 12996)  | 199 | 2.01 (1.54, 2.64)  |
|                               | AstraZeneca AZD1222                                                      | 7505 (1758, 32049)   | 16321 (394, 675651)  | 9724 (3363, 28118)   | 9   | 3.85 (1.01, 14.67) |
|                               | Moderna mRNA-1273                                                        | 11972 (6440, 22255)  | 17812 (10424, 30436) | 15078 (10230, 22224) | 31  | 1.94 (0.95, 3.98)  |
|                               | Interaction effect (AZD1222 vs. BNT162b2)                                |                      |                      |                      |     | 1.91 (0.49, 7.49)  |
|                               | Interaction effect (mRNA-1273 vs. BNT162b2)                              |                      |                      |                      |     | 0.96 (0.45, 2.09)  |

---

Footnotes 1. Mixed effects model, adjusted by baseline value, randomisation factors (age, inflammatory condition, vaccine platform), prior infection, booster platform; 2. Linear regression model at 4 weeks, adjusted by baseline value, randomisation factors (age, inflammatory condition, vaccine platform), prior infection, booster platform;

---



**Table S5: Patient disease activity by study arms**

|                                 | <b>Continue Methotrexate<br/>n (%)</b>               | <b>Suspend Methotrexate<br/>n (%)</b> | <b>Total<br/>n (%)</b> |
|---------------------------------|------------------------------------------------------|---------------------------------------|------------------------|
| <b>Patient disease activity</b> |                                                      |                                       |                        |
| <b>4 weeks</b>                  | <b>N = 124</b>                                       | <b>N = 123</b>                        | <b>N = 247</b>         |
| None (inactive)                 | 26 (21)                                              | 14 (11)                               | 40 (16)                |
| Mild activity                   | 65 (52)                                              | 63 (51)                               | 128 (52)               |
| Moderate activity               | 31 (25)                                              | 33 (27)                               | 64 (26)                |
| Severe activity                 | 2 (2)                                                | 13 (11)                               | 15 (6)                 |
| Very severe activity            | 0 (0)                                                | 0 (0)                                 | 0 (0)                  |
|                                 | Ordinal logistic regression OR (95% CI) <sup>1</sup> | 1.80 (1.10, 2.92)                     |                        |
| <b>12 weeks</b>                 | <b>N = 125</b>                                       | <b>N = 120</b>                        | <b>N = 245</b>         |
| None (inactive)                 | 26 (21)                                              | 15 (13)                               | 41 (17)                |
| Mild activity                   | 63 (50)                                              | 64 (53)                               | 127 (52)               |
| Moderate activity               | 31 (25)                                              | 32 (27)                               | 63 (26)                |
| Severe activity                 | 5 (4)                                                | 8 (7)                                 | 13 (5)                 |
| Very severe activity            | 0 (0)                                                | 1 (1)                                 | 1 (<1)                 |
|                                 | Ordinal logistic regression OR (95% CI) <sup>1</sup> | 1.46 (0.90, 2.38)                     |                        |

<sup>1</sup> Ordinal logistic regression model adjusted by baseline value, randomization factors (age, inflammatory condition, vaccine platform), prior infection, booster platform

**Table S6: Patient disease description by study arms**

|                                                      | <b>Continue Methotrexate<br/>n (%)</b> | <b>Suspend Methotrexate<br/>n (%)</b> | <b>Total<br/>n (%)</b> |
|------------------------------------------------------|----------------------------------------|---------------------------------------|------------------------|
| <b>Patient disease description since vaccination</b> |                                        |                                       |                        |
| <b>4 weeks</b>                                       | <b>N = 124</b>                         | <b>N = 123</b>                        | <b>N = 247</b>         |
| Much better                                          | 1 (1)                                  | 0 (0)                                 | 1 (<1)                 |
| Somewhat better                                      | 4 (3)                                  | 3 (2)                                 | 7 (3)                  |
| About the same                                       | 109 (88)                               | 89 (72)                               | 198 (80)               |
| Somewhat worse                                       | 9 (7)                                  | 26 (21)                               | 35 (14)                |
| Much worse                                           | 1 (1)                                  | 5 (4)                                 | 6 (2)                  |
| Ordinal logistic regression OR (95% CI) <sup>1</sup> |                                        | 3.62 (1.74, 7.54)                     |                        |
| <b>12 weeks</b>                                      | <b>N = 125</b>                         | <b>N = 120</b>                        | <b>N = 245</b>         |
| Much better                                          | 2 (2)                                  | 2 (2)                                 | 4 (2)                  |
| Somewhat better                                      | 2 (2)                                  | 6 (5)                                 | 8 (3)                  |
| About the same                                       | 106 (85)                               | 94 (78)                               | 200 (82)               |
| Somewhat worse                                       | 13 (10)                                | 16 (13)                               | 29 (12)                |
| Much worse                                           | 2 (2)                                  | 2 (2)                                 | 4 (2)                  |
| Ordinal logistic regression OR (95% CI) <sup>1</sup> |                                        | 0.99 (0.51, 1.92)                     |                        |

<sup>1</sup> Ordinal logistic regression model adjusted by baseline value, randomization factors (age, inflammatory condition, vaccine platform), prior infection, booster platform

**Table S7: Safety, flare outcomes and their treatment by study arms**

|                                                                              | Continue Methotrexate | Suspend Methotrexate | Total          |
|------------------------------------------------------------------------------|-----------------------|----------------------|----------------|
| <b>SAEs and disease flare-up</b>                                             |                       |                      |                |
| <b>Number of patients with at least one event</b>                            | <b>n = 127</b>        | <b>n = 127</b>       | <b>n = 254</b> |
| SAEs related to intervention                                                 | 0 (0)                 | 0 (0)                | 0 (0)          |
| SAEs unrelated to intervention                                               | 1 (1)                 | 2 (2)                | 3 (1)          |
| <b>Self-reported flare-up by 4 weeks</b>                                     | <b>n = 124</b>        | <b>n = 123</b>       | <b>n = 247</b> |
| At least one                                                                 | 38 (31)               | 69 (56)              | 107 (43)       |
| <b>Self-reported flare-up by 12 weeks</b>                                    | <b>n = 125</b>        | <b>n = 120</b>       | <b>n = 245</b> |
| At least one                                                                 | 56 (45)               | 85 (71)              | 141 (58)       |
| <b>0-4 Weeks</b>                                                             | <b>n = 124</b>        | <b>n = 123</b>       | <b>n = 247</b> |
| <b>Number of separate self-reported disease flare-ups</b>                    |                       |                      |                |
| 0                                                                            | 86 (69)               | 54 (44)              | 140 (57)       |
| 1                                                                            | 21 (17)               | 28 (23)              | 49 (20)        |
| 2                                                                            | 11 (9)                | 17 (14)              | 28 (11)        |
| 3                                                                            | 3 (2)                 | 11 (9)               | 14 (6)         |
| 4                                                                            | 1 (1)                 | 4 (3)                | 5 (2)          |
| 5                                                                            | 0 (0)                 | 3 (2)                | 3 (1)          |
| 6+                                                                           | 2 (2)                 | 6 (5)                | 8 (3)          |
| <b>Medical or nursing help sought to treat disease flare-ups<sup>1</sup></b> | <b>3 (2)</b>          | <b>6 (5)</b>         | <b>9 (4)</b>   |
| Hospital helpline                                                            | 0 (0)                 | 1 (1)                | 1 (<1)         |
| GP/practice nurse                                                            | 1 (1)                 | 4 (3)                | 5 (2)          |
| Hospital outpatient (telephone or in person)                                 | 1 (1)                 | 1 (1)                | 2 (1)          |
| Hospital A&E                                                                 | 0 (0)                 | 0 (0)                | 0 (0)          |
| Other                                                                        | 1 (1)                 | 0 (0)                | 1 (<1)         |
| <b>Pain killers/NSAIDs used to treat disease flare-ups</b>                   |                       |                      |                |
| Yes                                                                          | 42 (34)               | 53 (43)              | 95 (38)        |
| No                                                                           | 81 (65)               | 70 (57)              | 151 (61)       |
| Unknown <sup>2</sup>                                                         | 1 (1)                 | 0 (0)                | 1 (<1)         |
| <b>Glucocorticoid used to treat disease flare-ups</b>                        |                       |                      |                |
| Yes                                                                          | 8 (6)                 | 11 (9)               | 19 (8)         |
| No                                                                           | 115 (93)              | 112 (91)             | 227 (92)       |
| Unknown <sup>2</sup>                                                         | 1 (1)                 | 0 (0)                | 1 (<1)         |
| <b>Cream used to treat flare-up of skin condition</b>                        |                       |                      |                |
| Yes                                                                          | 21 (17)               | 25 (20)              | 46 (19)        |
| No                                                                           | 102 (82)              | 98 (80)              | 200 (81)       |
| Unknown <sup>2</sup>                                                         | 1 (1)                 | 0 (0)                | 1 (<1)         |
| <b>0-12 Weeks</b>                                                            | <b>n = 125</b>        | <b>n = 120</b>       | <b>n = 245</b> |
| <b>Number of separate self-reported disease flare-ups</b>                    |                       |                      |                |
| 0                                                                            | 69 (55)               | 35 (29)              | 104 (42)       |
| 1                                                                            | 20 (16)               | 22 (18)              | 42 (17)        |
| 2                                                                            | 13 (10)               | 14 (12)              | 27 (11)        |
| 3                                                                            | 8 (6)                 | 8 (7)                | 16 (7)         |
| 4                                                                            | 3 (2)                 | 11 (9)               | 14 (6)         |
| 5                                                                            | 4 (3)                 | 9 (8)                | 13 (5)         |

|                                                                              | Continue Methotrexate | Suspend Methotrexate | Total          |
|------------------------------------------------------------------------------|-----------------------|----------------------|----------------|
| 6+                                                                           | 8 (6)                 | 21 (18)              | 29 (12)        |
| <b>Medical or nursing help sought to treat disease flare-ups<sup>1</sup></b> | <b>14 (11)</b>        | <b>17 (14)</b>       | <b>31 (13)</b> |
| Hospital helpline                                                            | 5 (4)                 | 5 (4)                | 10 (4)         |
| GP/practice nurse                                                            | 2 (2)                 | 8 (7)                | 10 (4)         |
| Hospital outpatient (telephone or in person)                                 | 6 (5)                 | 7 (6)                | 13 (5)         |
| Hospitalization                                                              | 0 (0)                 | 1 (1)                | 1 (<1)         |
| Hospital A&E                                                                 | 0 (0)                 | 0 (0)                | 0 (0)          |
| Other                                                                        | 2 (2)                 | 1 (1)                | 3 (1)          |
| <b>Pain killers/NSAIDs used to treat disease flare-ups</b>                   |                       |                      |                |
| Yes                                                                          | 58 (46)               | 60 (50)              | 118 (48)       |
| No                                                                           | 67 (54)               | 60 (50)              | 127 (52)       |
| <b>Glucocorticoid used to treat disease flare-ups</b>                        |                       |                      |                |
| Yes                                                                          | 15 (12)               | 21 (18)              | 36 (15)        |
| No                                                                           | 108 (87)              | 98 (82)              | 206 (84)       |
| Unknown <sup>2</sup>                                                         | 2 (2)                 | 1 (1)                | 3 (1)          |
| <b>Cream used to treat flare-up of skin condition</b>                        |                       |                      |                |
| Yes                                                                          | 28 (22)               | 38 (32)              | 66 (27)        |
| No                                                                           | 97 (78)               | 82 (68)              | 179 (73)       |

Footnotes: 1. Participants can seek help from more than one source; 2. Participants did not provide answer for this question

**Figure S1: Flare treatment according to study arms during the 12-week study period**

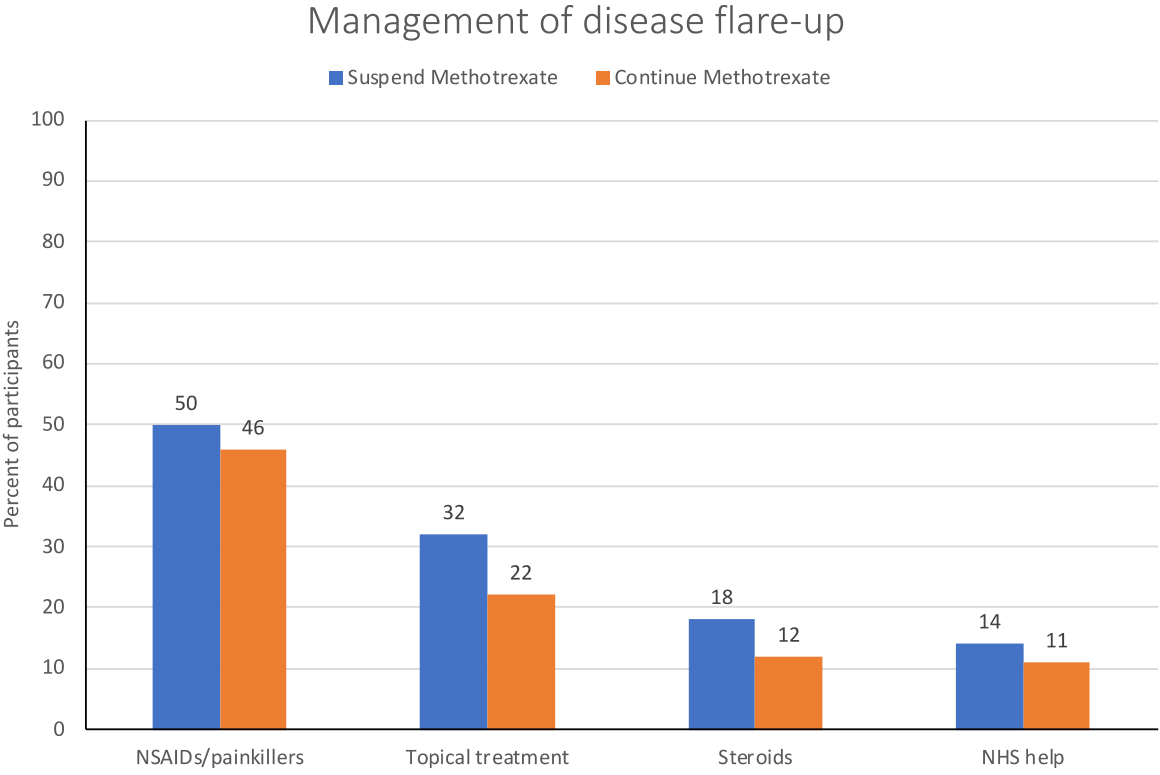

### List of Investigators

| Site                                                     | Title | First name | Second name   | Role <sup>1</sup> |
|----------------------------------------------------------|-------|------------|---------------|-------------------|
| Nottingham University Hospitals NHS Trust                | Dr    | Ira        | Pande         | PI                |
| Nottingham University Hospitals NHS Trust                | Dr    | Ting       | Seng Tang     | Co-Investigator   |
| Harrogate and District NHS Foundation Trust              | Dr    | Gui        | Tran          | PI                |
| Harrogate and District NHS Foundation Trust              | Prof  | Alison     | Layton        | Co-Investigator   |
| Great Western Hospitals NHS Foundation Trust             | Dr    | Elizabeth  | Price         | PI                |
| Great Western Hospitals NHS Foundation Trust             | Dr    | Lindsay    | Whittam       | Co-Investigator   |
| The Royal Wolverhampton NHS Trust                        | Dr    | Srinivasan | Venkatachalam | PI                |
| The Royal Wolverhampton NHS Trust                        |       | Ashley     | Hawarden      | Co-Investigator   |
| Aneurin Bevan UHB                                        | Dr    | Gwenan     | Huws          | PI                |
| Newcastle Upon Tyne Hospitals NHS Foundation Trust       | Dr    | Arthur     | Pratt         | PI                |
| Newcastle Upon Tyne Hospitals NHS Foundation Trust       | Prof  | Nick J     | Reynolds      | Co-Investigator   |
| Sherwood Forest Hospitals NHS Foundation Trust           | Prof  | David      | Walsh         | PI                |
| Sherwood Forest Hospitals NHS Foundation Trust           | Dr    | Theresa    | Joseph        | Co-Investigator   |
| Chesterfield Royal Hospital NHS Foundation Trust         | Dr    | Rengi      | Mathew        | PI                |
| Chesterfield Royal Hospital NHS Foundation Trust         | Dr    | Stamatios  | Oikonomou     | Co-Investigator   |
| Torbay and South Devon NHS Foundation Trust              | Dr    | Catherine  | Gwynne        | PI                |
| Torbay and South Devon NHS Foundation Trust              | Dr    | Rory       | Crowder       | Associate PI      |
| Gateshead Health NHS Foundation Trust                    | Dr    | Vadivelu   | Saravanan     | PI                |
| Gateshead Health NHS Foundation Trust                    | Dr    | Alaa       | Mustafa       | Co-Investigator   |
| University Hospitals Sussex NHS Foundation Trust         | Dr    | Cristina   | Tacu          | PI                |
| University Hospitals Sussex NHS Foundation Trust         | Dr    | Thomas     | Batty         | Associate PI      |
| Wirral University Teaching Hospital NHS Foundation Trust | Dr    | Emmanuel   | George        | PI                |
| Oxford University Hospitals NHS Foundation Trust         | Dr    | Anushka    | Soni          | PI                |
| Lancashire & South Cumbria NHS Foundation Trust          | Dr    | Sarah      | Horton        | PI                |
| Lancashire & South Cumbria NHS Foundation Trust          | Dr    | Ayesha     | Madan         | Co-Investigator   |

|                                                               |      |           |             |                 |
|---------------------------------------------------------------|------|-----------|-------------|-----------------|
| Norfolk and Norwich University Hospitals NHS Foundation Trust | Prof | Karl      | Gaffney     | PI              |
| Norfolk and Norwich University Hospitals NHS Foundation Trust | Dr   | Agnieszka | Lapin       | Co-Investigator |
| Norfolk and Norwich University Hospitals NHS Foundation Trust | Dr   | Sarah     | Bingham     | Co-Investigator |
| Norfolk and Norwich University Hospitals NHS Foundation Trust | Prof | Nick      | Levell      | Co-Investigator |
| Norfolk and Norwich University Hospitals NHS Foundation Trust | Dr   | Edwin     | Lim         | Co-Investigator |
| University Hospitals Coventry & Warwickshire NHS Trust        | Dr   | Nicola    | Gullick     | PI              |
| University Hospital Southampton NHS Foundation Trust          | Dr   | Chris     | Holroyd     | PI              |
| University Hospital Southampton NHS Foundation Trust          | Dr   | Salema    | Khalid      | Co-Investigator |
| University Hospital Southampton NHS Foundation Trust          | Dr   | May       | Lwin        | Co-Investigator |
| York & Scarborough Teaching Hospitals NHS Foundation Trust    | Dr   | Mike      | Green       | PI              |
| York and Scarborough Teaching Hospitals NHS Foundation Trust  | Dr   | Laura     | Hunt        | Co-Investigator |
| York and Scarborough Teaching Hospitals NHS Foundation Trust  | Dr   | Nicola    | Alcorn      | Co-Investigator |
| York and Scarborough Teaching Hospitals NHS Foundation Trust  | Dr   | Rob       | Ellis       | Co-Investigator |
| Midlands Partnership Foundation Trust                         | Prof | Samantha  | Hider       | PI              |
| North Cumbria Integrated Care NHS Foundation Trust            | Dr   | Alaa      | Hassan      | PI              |
| Imperial College Healthcare NHS Trust                         | Dr   | Taryn     | Youngstein  | PI              |
| The Dudley Group NHS Foundation Trust                         | Dr   | Karen     | Douglas     | PI              |
| The Dudley Group NHS Foundation Trust                         | Dr   | Gen Nen   | Ho          | Co-Investigator |
| The Dudley Group NHS Foundation Trust                         | Dr   | Kirsty    | Levasseur   | Co-Investigator |
| The Dudley Group NHS Foundation Trust                         | Ms.  | Sara      | Treacy      | Co-Investigator |
| The Dudley Group NHS Foundation Trust                         | Ms.  | Myrto     | Cheila      | Co-Investigator |
| North West Anglia NHS Foundation Trust                        | Dr   | John      | Pradeep     | PI              |
| Royal Glamorgan Cwm Taf Morgannwg University Health Board     | Dr   | Ceril     | Rhys-Dillon | PI              |
| Royal Glamorgan Cwm Taf Morgannwg University Health Board     | Dr   | Catrin    | Jones       | Co-Investigator |

<sup>1</sup>PI – principal investigator.

**List of Data Monitoring Committee (DMC) and Trial Steering Committee (TSC) Members:**

**DMC Members:**

Prof. Catherine Hewitt (Chair) – University of York

Prof. Aziz Sheikh – University of Edinburgh

Dr Ben Fisher – University of Birmingham

**TSC Members:**

**Independent members:**

Dr Elizabeth Ball – Musgrave Park Hospital

Dr James Galloway – Kings College London

Ms. Anandita Misra (PPI Member)

Ms. Yvonne Hurt (PPI Member)

Prof. Catherine Smith (Chair) – King's College

Prof. Martin Underwood – University of Warwick

Prof. Danielle Van Der Windt – Keele University

**Non-independent members:**

Prof. Abhishek Abhishek – University of Nottingham

Prof. Rosemary Boyton – Imperial College London
